# Supplementary material for: Scorpion and centipede alleviates severe asthma through M2 macrophage-derived exosomal miR-30b-5p
Source: PubMed Central journal article supplement (PMC9134957; doi:10.18632/aging.204053), 2022-05-02
Supplement: aging-14-204053-s002.pdf [file aging-14-204053-s002.pdf]

## SUPPLEMENTARY TABLE

Supplementary Table 1. The primers and sequence used in this study.

| Primers              | Sequence (5'-3')          |
|----------------------|---------------------------|
| U6-F                 | CGATACAGAGAAGATTAGCATGGC  |
| U6-R                 | AACGCTTCACGAATTTGCGT      |
| GAPDH-F              | CAAAATGGTGAAGGTCGGTGT     |
| GAPDH-R              | GAGGTCAATGAAGGGGTCGTT     |
| mmu-miR-653-5p-F     | GCAGGTGTTGAAACAATCTCTA    |
| mmu-miR-653-5p-R     | AGTGCGTGTCGTGGAGTCG       |
| mmu-miR-30b-5p-F     | GCAGTGTAACATCCTACACTCA    |
| mmu-miR-30b-5p-R     | AGTGCGTGTCGTGGAGTCG       |
| mmu-miR-451a-F       | CAGAAACCGTTACCATTACTGA    |
| mmu-miR-451a-R       | AGTGCGTGTCGTGGAGTCG       |
| mmu-miR-98-5p-F      | GGCGGGTGAGGTAGTAAGTTGT    |
| mmu-miR-98-5p-R      | AGTGCGTGTCGTGGAGTCG       |
| mmu-miR-10a-5p-F     | CGCAGTACCCTGTAGATCCGA     |
| mmu-miR-10a-5p-R     | AGTGCGTGTCGTGGAGTCG       |
| mmu-pri-miR-30b-5p-F | CATACATGCGTTGGCTGGGA      |
| mmu-pri-miR-30b-5p-R | CCTTTAGCTGGGCATGGTGAT     |
| mmu-pre-miR-30b-5p-F | GTTTCAGTTCATGTAAACATCCTAC |
| mmu-pre-miR-30b-5p-R | AGTGCGTGTCGTGGAGTCG       |
| NLRP3-F              | TGGACCTCAGTGACAATGCC      |
| NLRP3-R              | GAGCTCAGAACCAATGCGAG      |
| caspase-1-F          | AAACGCCATGGCTGACAAGA      |
| caspase-1-R          | CGTGCCTTGTCCATAGCAGT      |
| IRF7-F               | CCCCAGCCGGTGATCTTTC       |
| IRF7-R               | CACAGTGACGGTCCTCGAAG      |
| TLR3-F               | AAAATCCTTGCGTTGCGAAGT     |
| TLR3-R               | TGTTCAAGAGGAGGGCGAATAA    |
| GBP2-F               | TGGGGTAGACGATTCCGCTAA     |
| GBP2-R               | AGAAGTGACGGGTTTTCCGTT     |
